# Supplementary material for: The Fun30 Chromatin Remodeler Fft3 Controls Nuclear Organization and Chromatin Structure of Insulators and Subtelomeres in Fission Yeast
Source: PubMed Central journal article supplement (PMC4370569; doi:10.1371/journal.pgen.1005101), 2015-03-23

Figure S1

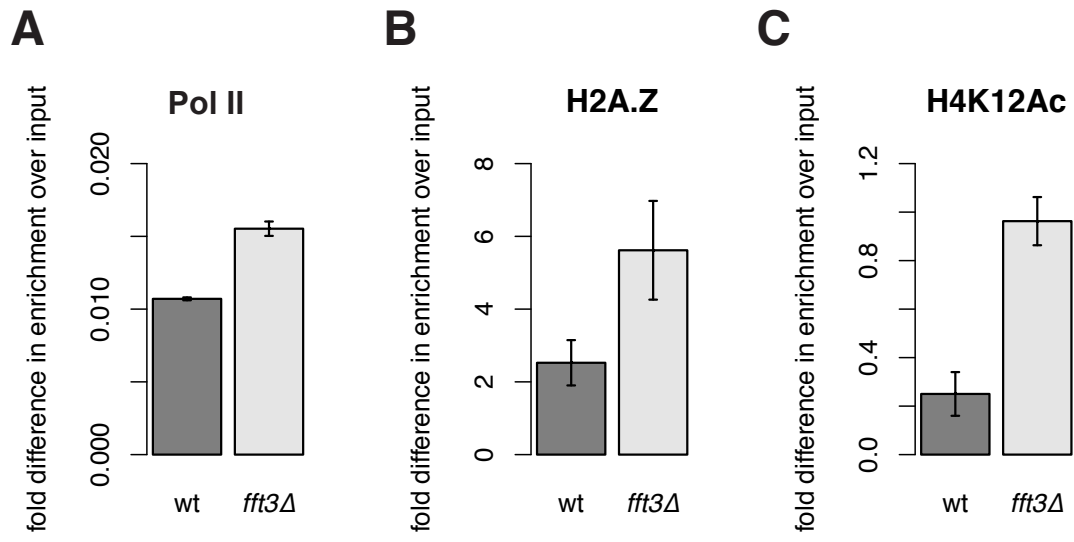

Supplement: pgen.1005101.s001.pdf [file pgen.1005101.s001.pdf]
