# Supplementary material for: The Fun30 Chromatin Remodeler Fft3 Controls Nuclear Organization and Chromatin Structure of Insulators and Subtelomeres in Fission Yeast
Source: PubMed Central journal article supplement (PMC4370569; doi:10.1371/journal.pgen.1005101), 2015-03-23
Supplement: pgen.1005101.s011.pdf [file pgen.1005101.s011.pdf]

**Table S1: List of strains used in this study**

| <b>Strain</b> | <b>Genotype</b>                                                                                                       | <b>Reference</b>               |
|---------------|-----------------------------------------------------------------------------------------------------------------------|--------------------------------|
| Hu29          | <i>h- ade6-M210 leu1-32 ura4-D18</i>                                                                                  | [1]                            |
| Hu1867        | <i>h+ fft3::hph ade6-M210 uraDS/E leu1-32</i>                                                                         | [1]                            |
| Hu1824        | <i>h- pht1-myc::KanMx6 leu1-32 ade6-M210 ura4-D18</i>                                                                 | [3]                            |
| Hu1993        | <i>h- fft3::hph pht1-myc::KanMx6 leu1-32 ade6-M210 ura4-</i>                                                          | [3]                            |
| Hu2130        | <i>h- Man1-7myc-Dam:NAT (nmt41 promoter)</i>                                                                          | [4]                            |
| Hu2078        | <i>h- 7myc-Dam-NLS:NATr (nmt41 promoter)</i>                                                                          | [4]                            |
| Hu2193        | <i>fft3::hph Man1-7myc-Dam:Nat (nmt41 promoter)</i>                                                                   | This study                     |
| Hu2206        | <i>fft3::hph 7myc-Dam-NLS:NATr (nmt41 promoter)</i>                                                                   | This study                     |
| Hu2417        | <i>h- fft3-K418R-myc::hph ade6-M210, ura4-D18, leu1-32</i>                                                            | This study                     |
| Hu1911        | <i>h+ fft3-myc::hph leu1-32 ade6-210 ura4-D18</i>                                                                     | This study                     |
| Hu1271        | <i>h+ fft3-TAP Kan-MX6 leu1-32 ade6-210 ura4-D18</i>                                                                  | This study                     |
| Hu2330        | <i>h- sfc4-myc::kan ade6-M210 leu1-32 ura4-D18</i>                                                                    | This study                     |
| Hu2343        | <i>sfc4-myc::kan fft3-TAP::hph ade6-M210 leu1-32 ura4-D18</i>                                                         | This study                     |
| Hu2192        | <i>h+ nup61::kan, ade6-M216, ura4-D18, leu1-32</i>                                                                    | Bioneer Deletion<br>Collection |
| Hu2173        | <i>h+ man1::kan, ade6-M216, ura4-D18, leu1-32</i>                                                                     | Bioneer Deletion<br>Collection |
| Hu2413        | <i>cnd2-GFP::NatR</i>                                                                                                 | This study                     |
| Hu2414        | <i>cnd2-GFP::NatR fft3D::HygR</i>                                                                                     | This study                     |
| Hu802         | <i>h- clr6-1 (ts)</i>                                                                                                 | [5]                            |
| Hu2108        | <i>clr6-1 (ts) fft3::hph ade6-M210? uraDS/E? leu1-32?</i>                                                             | This study                     |
| Hu369         | <i>h- clr3::kanMX ade6-M210, ura4-D18, leu1-32</i>                                                                    | [5]                            |
| Hu2102        | <i>fft3::hph clr3::KanMX adeM210 leu1-32 ura4-</i>                                                                    | This study                     |
| Hu1026        | <i>h- hos2::LEU2 leu1-32</i>                                                                                          | [5]                            |
| Hu2117        | <i>fft3::hph hos2::leu2 leu1-32 ade6M210? uraDS/E?</i>                                                                | This study                     |
| Hu2424        | <i>h+ otr1R(SphI)::ura4+ ura4-DS/E ade6-M210 leu1Δ::nmt1(81x)-dam-myc-<br/>nup85-kan</i>                              | [2]                            |
| Hu2422        | <i>h+ otr1R(SphI)::ura4+ ura4-DS/E ade6-M210 leu1Δ::nmt1(81x)-dam-myc-<br/>kan</i>                                    | [2]                            |
| Hu2438        | <i>fft3::HygR leu1D::nmt1(81x)-dam-myc-nup85-KanR</i>                                                                 | This study                     |
| Hu2434        | <i>fft3::HygR leu1D::nmt1(81x)-dam-myc-KanR</i>                                                                       | This study                     |
| Hu2582        | <i>h90 taz1-mCherry::kanR hus5+::ccr1N-GFP::LEU2 leu1-32 lys1-131 ura4-<br/>D18 ade6-m210</i>                         | [6]                            |
| Hu2583        | <i>h90 taz1-mCherry::kanR hus5+::ccr1N-GFP::LEU2 leu1-32 bqt4D::ura4+<br/>lys1-131 ura4-D18 ade6-m210</i>             | [6]                            |
| Hu2575        | <i>h90 taz1-mCherry::kanR hus5+::ccr1N-GFP::LEU2 leu1-32 fft3D::HygR<br/>lys1-131 ura4-D18 ade6-m210</i>              | This study                     |
| Hu2595        | <i>h90 taz1-mCherry::kanR hus5+::ccr1N-GFP::LEU2 leu1-32 bqt4D::ura4+<br/>fft3D::HygR lys1-131 ura4-D18 ade6-m210</i> | This study                     |
| Hu2241        | <i>h- Nup61-myc::Kan ade6-M210 ura4-D18 leu1-32</i>                                                                   | This study                     |
| Hu2256        | <i>h- Nup61-myc::Kan fft3D::Hyg ade6-M210 ura4-D18orDS/E leu1-32</i>                                                  | This study                     |
| Hu2530        | <i>h- Nup61-myc::Kan man1D::Kan ade6-M21X ura4-D18 leu1-32</i>                                                        | This study                     |
| Hu2566        | <i>h- Nup61-myc::Kan bqt4D::ura4+ ade6-M21X ura4-D18 leu+</i>                                                         | This study                     |
| Hu2568        | <i>h- Nup61-myc::Kan bqt4D::ura4+ fft3D::Hyg ade6-M21X ura4-D18orDS/E<br/>leu1-32</i>                                 | This study                     |
| Hu2446        | <i>fft3-K418R-myc::Hyg 7myc-Dam-NLS:NAT (nmt41 promoter)</i>                                                          | This study                     |
| Hu2448        | <i>fft3-K418R-myc::Hyg Man1-7myc-Dam:NAT (nmt41 promoter)</i>                                                         | This study                     |
| Hu2771        | <i>h- pht1-GFP::NAT leu1-32 ura4-</i>                                                                                 | [7]                            |
| Hu2791        | <i>pht1-GFP::NAT fft3::HygR</i>                                                                                       | This study                     |
| Hu2797        | <i>pht1-GFP::NAT fft3-K418R-myc::HygR</i>                                                                             | This study                     |
| Hu2779        | <i>fft3-myg::HygR ura4+</i>                                                                                           | This study                     |
| Hu2803        | <i>fft3-myg::HygR ura4::ura4-LTR</i>                                                                                  | This study                     |

## References in Supplemental Material

1. Strålfors A, Walfridsson J, Bhuiyan H, Ekwall K (2011) The FUN30 chromatin remodeler, Fft3, protects centromeric and subtelomeric domains from euchromatin formation. *PLoS Genet* 7: e1001334. doi:10.1371/journal.pgen.1001334.
2. Woolcock KJ, Stunnenberg R, Gaidatzis D, Hotz H-R, Emmerth S, et al. (2012) RNAi keeps Atf1-bound stress response genes in check at nuclear pores. *Genes & Development* 26: 683–692. doi:10.1101/gad.186866.112.
3. Buchanan L, Durand-Dubief M, Roguev A, Sakalar C, Wilhelm B, et al. (2009) The *Schizosaccharomyces pombe* JmjC-protein, Msc1, prevents H2A.Z localization in centromeric and subtelomeric chromatin domains. *PLoS Genet* 5: e1000726. doi:10.1371/journal.pgen.1000726.
4. Steglich B, Filion GJ, van Steensel B, Ekwall K (2012) The inner nuclear membrane proteins Man1 and Ima1 link to two different types of chromatin at the nuclear periphery in *S. pombe*. *Nucleus* 3: 77–87.
5. Wirén M, Silverstein RA, Sinha I, Walfridsson J, Lee H-M, et al. (2005) Genome wide analysis of nucleosome density histone acetylation and HDAC function in fission yeast. *The EMBO Journal* 24: 2906–2918.
6. Chikashige Y, Yamane M, Okamasa K, Tsutsumi C, Kojidani T, et al. (2009) Membrane proteins Bqt3 and -4 anchor telomeres to the nuclear envelope to ensure chromosomal bouquet formation. *The Journal of Cell Biology* 187: 413–427. doi:10.1083/jcb.200902122.
7. Ogiyama Y, Ohno Y, Kubota Y, Ishii K (2013) Epigenetically induced paucity of histone H2A.Z stabilizes fission-yeast ectopic centromeres. *Nature Structural & Molecular Biology* 20: 1397–1406. doi:10.1038/nsmb.2697.
