# Supplementary material for: The Fun30 Chromatin Remodeler Fft3 Controls Nuclear Organization and Chromatin Structure of Insulators and Subtelomeres in Fission Yeast
Source: PubMed Central journal article supplement (PMC4370569; doi:10.1371/journal.pgen.1005101), 2015-03-23
Supplement: pgen.1005101.s012.pdf [file pgen.1005101.s012.pdf]

**Table S2: List of primers used in this study**

| <b>Primer name</b> | <b>sequence</b>                                                                  |
|--------------------|----------------------------------------------------------------------------------|
| ATPase-F           | TGATGAAATGGGGCTCGGTAGAACTTGTCAAACCATCGCTT                                        |
| ATPase-R           | TTTTCACGACGCGTTTTTGGCGTGGTATATAAATGG                                             |
| ATPaseL-F          | GATCATTGGGATTAATTGGCTTTACCTTTTGTACGAGCTCAAACCTGGCT<br>GGTATCCTGGCTGATGAAATGGGGCT |
| Dg1-F              | AAT TGT GGT GGT GTG GTA ATA C                                                    |
| Dg1-R              | GGG TTC ATC GTT TCC ATT CAG                                                      |
| LTR_SEB-F          | ACG TAG TGC ATC ATA GCG TAG TGT AGT                                              |
| LTR_SEB-R          | ACT CGC AGC AAA AAT CAT GGT                                                      |
| Act1-F             | TGA GGA GCA CCC TTG CTT GT                                                       |
| Act1-R             | TCT TCT CAC GGT TGG ATT TGG                                                      |
| SPBPB2B2.06c-F     | CACTCACGGTTGGCTTAATGG                                                            |
| SPBPB2B2.06c-R     | TTCGCCAAAGTCGGCTTTAT                                                             |
| SPBPB8B6.04c-F     | GTGTTGTCAAAAAGACCAGTTCGT                                                         |
| SPBPB8B6.04c-R     | CACCTTGACTTTTCGTTTCCTACA                                                         |
| SPBPB8B6.02c-F     | CTCTGGTGCTTTCAAGCGAAT                                                            |
| SPBPB8B6.02c-R     | TGGCAAGGCCGAAAATCAT                                                              |
| SPBPB21E7.09-F     | TGGGAGGAACTATCGCTGGAT                                                            |
| SPBPB21E7.09-R     | CCAGCGGCATAGTCAACTGTT                                                            |
| Cen1-F             | CAGACAATCGCATGGTACTATC                                                           |
| Cen1-R             | AGGTGAAGCGTAAGTGAGTG                                                             |
| tRNA_Pro_l         | GGCCGTTTGGTCTAGTGGTA                                                             |
| tRNA_Pro_r         | GCTGTTGTGGGAATCGAAC                                                              |
| tRNA_Val_l         | GGTCGTGTGGTTTAGATGGTT                                                            |
| tRNA_Val_r         | ATCGTGCCAAGACTCGAACT                                                             |
| SPBPB2B2.01-F      | GGAGCTATTGGTACCGGTGTTT                                                           |
| SPBPB2B2.01-R      | GCTGCTCCCCCCTATAAAG                                                              |
| SPBPB2B2.05-F      | TGGTGGTGAATCGGTGCAT                                                              |
| SPBPB2B2.05-R      | TTTTGGGAGCATTTGGATCAA                                                            |
| LTR_all_F          | CGTACCATGTATGATACGATATGGAGA                                                      |
| LTR_all_R          | AGCTCATAACTGAACTGAGGAACG                                                         |
| Proline_Probe      | GCTGTTGTGGGAATCGAAC                                                              |
| Alanine_Probe      | GGACAAGCCAGAACTCGAA                                                              |
| SPSNORNA.33_Probe  | TATTTAGGCTCATTATGCAAGGA                                                          |
| ura4-5'-F          | AGAGCTGAGGGGATGAAAAA                                                             |
| ura4-5'-R          | TTTCGGATTCTTCGTCAA                                                               |
| ura4-3'-F          | TGGTATCGGCTTGGATGTTA                                                             |
| ura4-3'-R          | CAGCTCCATAGACTCCACGA                                                             |
